# Supplementary material for: Broadband light emitting zero-dimensional antimony and bismuth-based hybrid halides with diverse structures
Source: Royal Society of Chemistry journal article supplement (doi:10.1039/d1tc04198c), 2021-01-01
Supplement: d1tc04198c1.pdf [file d1tc04198c1.pdf]

## Supporting Information

# Broadband Light Emitting Zero-Dimensional Antimony and Bismuth-Based Hybrid Halides with Diverse Structures

Chenkai Deng<sup>†</sup>, Shiqiang Hao<sup>‡</sup>, Kunjie Liu<sup>†</sup>, Maxim S. Molokeev<sup>⊥</sup>, Christopher Wolverton<sup>‡</sup>, Liubing Fan<sup>†</sup>, Guojun Zhou<sup>Δ</sup>, Da Chen<sup>†</sup>, Jing Zhao<sup>†,\*</sup>, Quanlin Liu<sup>†,\*</sup>

<sup>†</sup> The Beijing Municipal Key Laboratory of New Energy Materials and Technologies, School of Materials Sciences and Engineering, University of Science and Technology Beijing, Beijing 100083, China.

<sup>‡</sup> Department of Materials Science and Engineering, Northwestern University, Evanston, Illinois 60208, United States.

<sup>⊥</sup> Laboratory of Crystal Physics, Kirensky Institute of Physics, Federal Research Center KSC SB RAS, Krasnoyarsk 660036 (Russia), Siberian Federal University, Krasnoyarsk, 660041 (Russia)  
Department of Physics, Far Eastern State Transport University Khabarovsk, 680021 (Russia)

<sup>Δ</sup> Key Laboratory of Magnetic Molecules and Magnetic Information Materials (Ministry of Education), School of Chemistry and Material Science, Shanxi Normal University, Linfen 041004, China

E-mail: \* [jingzhao@ustb.edu.cn](mailto:jingzhao@ustb.edu.cn)

\* [qliu@ustb.edu.cn](mailto:qliu@ustb.edu.cn)

## CONTENTS

**Table S1** (Atomic coordinates ( $\times 10^4$ ) and equivalent isotropic displacement parameters ( $\text{\AA}^2 \times 10^3$ ) for **2** at 293(2) K with estimated standard deviations in parentheses.)

**Table S2** (Anisotropic displacement parameters ( $\text{\AA}^2 \times 10^3$ ) for **2** at 293(2) K with estimated standard deviations in parentheses.)

**Table S3** (Bond lengths [ $\text{\AA}$ ] for **2** at 293(2) K with estimated standard deviations in parentheses.)

**Table S4** (Bond angles [ $^\circ$ ] for **2** at 293(2) K with estimated standard deviations in parentheses.)

**Table S5** (Atomic coordinates ( $\times 10^4$ ) and equivalent isotropic displacement parameters ( $\text{\AA}^2 \times 10^3$ ) for **3** at 293(2) K with estimated standard deviations in parentheses.)

**Table S6** (Anisotropic displacement parameters ( $\text{\AA}^2 \times 10^3$ ) for **3** at 293(2) K with estimated standard deviations in parentheses.)

**Table S7** (Bond lengths [ $\text{\AA}$ ] for **3** at 293(2) K with estimated standard deviations in parentheses.)

**Table S8** (Bond angles [ $^\circ$ ] for **3** at 293(2) K with estimated standard deviations in parentheses.)

**Figure S1** (TGA curves of the obtained OIMHs **1-4**)

**Figure S2** (Band structures of compounds **1-4**)

**Figure S3** (Densities of states and their orbital projections compounds **1-4**)

**Figure S4** (PLE and PL spectra of (a) **1**, (b) **2** and (c) **3** at RT. (d) CIE color coordinates of **1-3**)

**Figure S5** (Fitting of the FWHM for compound **4** as a function of temperature)

**Table 1.** Atomic coordinates ( $\times 10^4$ ) and equivalent isotropic displacement parameters ( $\text{\AA}^2 \times 10^3$ ) for **2** at 293(2) K with estimated standard deviations in parentheses.

| Label  | x       | y        | z       | Occupancy | $U_{\text{eq}}^*$ |
|--------|---------|----------|---------|-----------|-------------------|
| Bi(1)  | 6594(1) | -132(1)  | 3682(1) | 1         | 11(1)             |
| Bi(2)  | 7108(1) | 5169(1)  | 6219(1) | 1         | 12(1)             |
| Br(5)  | 5576(1) | -2102(1) | 3613(1) | 1         | 17(1)             |
| Br(8)  | 6163(1) | 7117(1)  | 6211(1) | 1         | 17(1)             |
| Br(10) | 8276(1) | 3088(1)  | 6186(1) | 1         | 18(1)             |
| Br(1)  | 8253(1) | -385(1)  | 2951(1) | 1         | 16(1)             |
| Br(2)  | 7747(1) | 1835(1)  | 3760(1) | 1         | 19(1)             |
| Br(6)  | 4690(1) | 541(1)   | 3000(1) | 1         | 18(1)             |
| Br(7)  | 5806(1) | 4645(1)  | 6986(1) | 1         | 18(1)             |
| Br(4)  | 4960(1) | 255(1)   | 4355(1) | 1         | 20(1)             |
| Br(9)  | 4853(1) | 4748(1)  | 5621(1) | 1         | 19(1)             |
| Br(12) | 9255(1) | 5775(1)  | 6807(1) | 1         | 21(1)             |
| Br(3)  | 8766(1) | -890(1)  | 4263(1) | 1         | 23(1)             |
| Br(11) | 8506(1) | 5537(1)  | 5462(1) | 1         | 26(1)             |
| N(5)   | 4393(5) | 2830(4)  | 4924(2) | 1         | 16(2)             |
| N(1)   | 1507(5) | 4526(4)  | 6352(2) | 1         | 19(2)             |
| N(4)   | 9048(6) | -559(5)  | 6385(2) | 1         | 25(2)             |
| N(3)   | 7246(5) | 1503(5)  | 6929(2) | 1         | 21(2)             |
| N(2)   | 2070(5) | 3144(4)  | 7464(2) | 1         | 19(2)             |
| N(6)   | 7997(5) | 2409(4)  | 5117(2) | 1         | 19(2)             |
| C(9)   | 8784(7) | -1038(6) | 5928(2) | 1         | 25(2)             |
| C(2)   | 1571(6) | 3776(6)  | 5985(2) | 1         | 21(2)             |
| C(10)  | 8922(7) | -1334(6) | 6738(2) | 1         | 27(2)             |
| O(00)  | 5581(7) | 3132(5)  | 2889(2) | 1         | 56(2)             |
| C(7)   | 8381(6) | 860(5)   | 6869(2) | 1         | 18(2)             |
| C(3)   | 2194(6) | 4212(5)  | 6791(2) | 1         | 17(2)             |
| C(12)  | 5624(6) | 2397(5)  | 5129(2) | 1         | 16(2)             |
| C(5)   | 3407(6) | 2742(5)  | 7511(2) | 1         | 18(2)             |
| C(1)   | 2011(7) | 5508(6)  | 6216(2) | 1         | 27(2)             |
| C(8)   | 8196(7) | 318(6)   | 6419(2) | 1         | 23(2)             |
| C(15)  | 9111(6) | 2899(6)  | 4938(2) | 1         | 23(2)             |
| C(11)  | 3263(6) | 2300(6)  | 5086(2) | 1         | 25(2)             |
| C(6)   | 7414(7) | 2148(6)  | 7339(2) | 1         | 28(2)             |
| C(4)   | 1506(6) | 3325(6)  | 6994(2) | 1         | 21(2)             |
| C(13)  | 6757(6) | 2847(5)  | 4914(2) | 1         | 19(2)             |

C(14)      8063(7)      1283(6)      5054(2)      1      25(2)

---

\* $U_{eq}$  is defined as one third of the trace of the orthogonalized  $U_{ij}$  tensor.

**Table S2.** Anisotropic displacement parameters ( $\text{\AA}^2 \times 10^3$ ) for **2** at 293(2) K with estimated standard deviations in parentheses.

| Label  | U <sub>11</sub> | U <sub>22</sub> | U <sub>33</sub> | U <sub>12</sub> | U <sub>13</sub> | U <sub>23</sub> |
|--------|-----------------|-----------------|-----------------|-----------------|-----------------|-----------------|
| Bi(1)  | 11(1)           | 10(1)           | 11(1)           | 0(1)            | 1(1)            | 0(1)            |
| Bi(2)  | 13(1)           | 11(1)           | 12(1)           | 1(1)            | 3(1)            | 0(1)            |
| Br(5)  | 18(1)           | 12(1)           | 20(1)           | -1(1)           | -1(1)           | 0(1)            |
| Br(8)  | 22(1)           | 12(1)           | 16(1)           | 2(1)            | 3(1)            | 0(1)            |
| Br(10) | 26(1)           | 12(1)           | 15(1)           | 3(1)            | 3(1)            | 0(1)            |
| Br(1)  | 16(1)           | 16(1)           | 16(1)           | 1(1)            | 4(1)            | -2(1)           |
| Br(2)  | 27(1)           | 12(1)           | 18(1)           | -4(1)           | 2(1)            | -2(1)           |
| Br(6)  | 16(1)           | 21(1)           | 17(1)           | -2(1)           | -2(1)           | 5(1)            |
| Br(7)  | 22(1)           | 17(1)           | 16(1)           | -2(1)           | 7(1)            | 1(1)            |
| Br(4)  | 24(1)           | 22(1)           | 15(1)           | 1(1)            | 7(1)            | -2(1)           |
| Br(9)  | 19(1)           | 21(1)           | 18(1)           | -2(1)           | -1(1)           | -4(1)           |
| Br(12) | 16(1)           | 22(1)           | 25(1)           | 3(1)            | -2(1)           | -7(1)           |
| Br(3)  | 19(1)           | 21(1)           | 29(1)           | -2(1)           | -8(1)           | 7(1)            |
| Br(11) | 31(1)           | 24(1)           | 27(1)           | 1(1)            | 16(1)           | 6(1)            |
| N(5)   | 20(3)           | 16(3)           | 12(3)           | 1(2)            | 0(2)            | 0(2)            |
| N(1)   | 19(3)           | 18(3)           | 21(3)           | -2(3)           | 2(2)            | -2(2)           |
| N(4)   | 24(3)           | 17(3)           | 32(3)           | -3(3)           | -2(3)           | -2(3)           |
| N(3)   | 11(3)           | 24(4)           | 28(3)           | -1(3)           | 2(2)            | 5(3)            |
| N(2)   | 25(3)           | 11(3)           | 20(3)           | 2(3)            | 4(2)            | 1(2)            |
| N(6)   | 22(3)           | 16(3)           | 18(3)           | -1(3)           | 0(2)            | -3(2)           |
| C(9)   | 31(4)           | 20(4)           | 24(4)           | 3(3)            | 2(3)            | -4(3)           |
| C(2)   | 19(4)           | 21(4)           | 23(4)           | -3(3)           | 3(3)            | -5(3)           |
| C(10)  | 36(4)           | 17(4)           | 24(4)           | 0(3)            | -11(3)          | 4(3)            |
| O(00)  | 83(5)           | 32(4)           | 61(4)           | 30(4)           | 54(4)           | 18(3)           |
| C(7)   | 16(3)           | 9(4)            | 27(4)           | 1(3)            | -6(3)           | 4(3)            |
| C(3)   | 20(4)           | 12(4)           | 20(3)           | -5(3)           | 0(3)            | 0(3)            |
| C(12)  | 19(3)           | 14(4)           | 14(3)           | 6(3)            | -3(3)           | 2(3)            |
| C(5)   | 17(3)           | 18(4)           | 20(3)           | 4(3)            | 2(3)            | 2(3)            |
| C(1)   | 30(4)           | 24(5)           | 30(4)           | -3(3)           | 9(3)            | 5(3)            |
| C(8)   | 21(4)           | 25(5)           | 23(4)           | 13(3)           | -3(3)           | 9(3)            |
| C(15)  | 20(4)           | 24(4)           | 26(4)           | -2(3)           | 7(3)            | -6(3)           |
| C(11)  | 17(4)           | 30(5)           | 29(4)           | -3(3)           | 3(3)            | 1(3)            |
| C(6)   | 38(5)           | 23(5)           | 24(4)           | 7(4)            | 6(3)            | -1(3)           |
| C(4)   | 19(4)           | 21(4)           | 23(4)           | -1(3)           | -1(3)           | 3(3)            |
| C(13)  | 22(4)           | 18(4)           | 16(3)           | 3(3)            | 0(3)            | -1(3)           |

C(14)      26(4)      21(4)      28(4)      0(3)      -2(3)      3(3)

---

The anisotropic displacement factor exponent takes the form:  $-2\pi^2[h^2a^{*2}U_{11} + \dots + 2hka^*b^*U_{12}]$ .

**Table S3.** Bond lengths [ $\text{\AA}$ ] for **2** at 293(2) K with estimated standard deviations in parentheses.

| Label        | Distances | Label       | Distances |
|--------------|-----------|-------------|-----------|
| Bi(1)-Br(5)  | 2.8228(7) | N(1)-C(3)   | 1.489(8)  |
| Bi(1)-Br(1)  | 2.9353(6) | N(1)-C(1)   | 1.478(9)  |
| Bi(1)-Br(2)  | 2.8755(7) | N(4)-C(9)   | 1.505(9)  |
| Bi(1)-Br(6)  | 2.8452(7) | N(4)-C(10)  | 1.490(9)  |
| Bi(1)-Br(4)  | 2.8082(7) | N(4)-C(8)   | 1.474(9)  |
| Bi(1)-Br(3)  | 2.8947(7) | N(3)-C(7)   | 1.484(8)  |
| Bi(2)-Br(8)  | 2.7672(7) | N(3)-C(6)   | 1.489(9)  |
| Bi(2)-Br(10) | 3.0262(7) | N(2)-C(5)   | 1.487(8)  |
| Bi(2)-Br(7)  | 2.8610(6) | N(2)-C(4)   | 1.487(8)  |
| Bi(2)-Br(9)  | 2.8627(7) | N(6)-C(15)  | 1.477(8)  |
| Bi(2)-Br(12) | 2.8225(7) | N(6)-C(13)  | 1.491(8)  |
| Bi(2)-Br(11) | 2.8498(7) | N(6)-C(14)  | 1.510(9)  |
| N(5)-C(12)   | 1.482(8)  | C(7)-C(8)   | 1.520(9)  |
| N(5)-C(11)   | 1.493(8)  | C(3)-C(4)   | 1.536(9)  |
| N(1)-C(2)    | 1.486(8)  | C(12)-C(13) | 1.522(9)  |

Symmetry transformations used to generate equivalent atoms:

**Table S4.** Bond angles [°] for **2** at 293(2) K with estimated standard deviations in parentheses.

| Label               | Angles     | Label               | Angles    |
|---------------------|------------|---------------------|-----------|
| Br(5)-Bi(1)-Br(1)   | 94.89(2)   | Br(12)-Bi(2)-Br(7)  | 88.95(2)  |
| Br(5)-Bi(1)-Br(2)   | 177.39(2)  | Br(12)-Bi(2)-Br(9)  | 174.61(2) |
| Br(5)-Bi(1)-Br(6)   | 90.48(2)   | Br(12)-Bi(2)-Br(11) | 90.41(2)  |
| Br(5)-Bi(1)-Br(3)   | 89.30(2)   | Br(11)-Bi(2)-Br(10) | 83.77(2)  |
| Br(2)-Bi(1)-Br(1)   | 83.786(19) | Br(11)-Bi(2)-Br(7)  | 175.36(2) |
| Br(2)-Bi(1)-Br(3)   | 88.35(2)   | Br(11)-Bi(2)-Br(9)  | 89.62(2)  |
| Br(6)-Bi(1)-Br(1)   | 85.697(19) | C(12)-N(5)-C(11)    | 111.3(5)  |
| Br(6)-Bi(1)-Br(2)   | 91.66(2)   | C(2)-N(1)-C(3)      | 114.1(5)  |
| Br(6)-Bi(1)-Br(3)   | 171.17(2)  | C(1)-N(1)-C(2)      | 110.2(5)  |
| Br(4)-Bi(1)-Br(5)   | 88.32(2)   | C(1)-N(1)-C(3)      | 109.6(5)  |
| Br(4)-Bi(1)-Br(1)   | 175.67(2)  | C(10)-N(4)-C(9)     | 109.2(6)  |
| Br(4)-Bi(1)-Br(2)   | 93.11(2)   | C(8)-N(4)-C(9)      | 109.8(5)  |
| Br(4)-Bi(1)-Br(6)   | 91.39(2)   | C(8)-N(4)-C(10)     | 113.7(6)  |
| Br(4)-Bi(1)-Br(3)   | 97.43(2)   | C(7)-N(3)-C(6)      | 113.6(5)  |
| Br(3)-Bi(1)-Br(1)   | 85.53(2)   | C(4)-N(2)-C(5)      | 115.2(5)  |
| Br(8)-Bi(2)-Br(10)  | 176.10(2)  | C(15)-N(6)-C(13)    | 111.3(5)  |
| Br(8)-Bi(2)-Br(7)   | 92.11(2)   | C(15)-N(6)-C(14)    | 110.2(5)  |
| Br(8)-Bi(2)-Br(9)   | 84.70(2)   | C(13)-N(6)-C(14)    | 112.6(5)  |
| Br(8)-Bi(2)-Br(12)  | 89.92(2)   | N(3)-C(7)-C(8)      | 110.3(5)  |
| Br(8)-Bi(2)-Br(11)  | 92.48(2)   | N(1)-C(3)-C(4)      | 111.0(5)  |
| Br(7)-Bi(2)-Br(10)  | 91.63(2)   | N(5)-C(12)-C(13)    | 110.5(5)  |
| Br(7)-Bi(2)-Br(9)   | 91.45(2)   | N(4)-C(8)-C(7)      | 114.2(5)  |
| Br(9)-Bi(2)-Br(10)  | 96.32(2)   | N(2)-C(4)-C(3)      | 109.9(5)  |
| Br(12)-Bi(2)-Br(10) | 89.04(2)   | N(6)-C(13)-C(12)    | 110.8(5)  |

Symmetry transformations used to generate equivalent atoms:



**Table S5.** Atomic coordinates ( $\times 10^4$ ) and equivalent isotropic displacement parameters ( $\text{\AA}^2 \times 10^3$ ) for **3** at 293(2) K with estimated standard deviations in parentheses.

| Label  | x        | y       | z        | Occupancy | $U_{\text{eq}}^*$ |
|--------|----------|---------|----------|-----------|-------------------|
| Sb(1)  | 6359(1)  | 5164(1) | 3884(1)  | 1         | 20(1)             |
| Sb(2)  | 8349(1)  | 7500    | 8657(1)  | 1         | 22(1)             |
| Sb(3)  | 9991(1)  | 5862(1) | 2362(1)  | 1         | 21(1)             |
| Sb(4)  | 6631(1)  | 7500    | 7908(1)  | 1         | 27(1)             |
| Cl(1)  | 6809(1)  | 4532(1) | 3020(2)  | 1         | 37(1)             |
| Cl(2)  | 7016(1)  | 5232(1) | 5656(2)  | 1         | 34(1)             |
| Cl(3)  | 9335(1)  | 5804(1) | 4197(2)  | 1         | 36(1)             |
| Cl(4)  | 8501(1)  | 7500    | 11458(2) | 1         | 38(1)             |
| Cl(5)  | 8355(1)  | 7500    | 6158(2)  | 1         | 25(1)             |
| Cl(6)  | 6904(1)  | 7500    | 5449(2)  | 1         | 41(1)             |
| Cl(7)  | 5816(1)  | 5951(1) | 4806(2)  | 1         | 37(1)             |
| Cl(8)  | 10553(1) | 5139(1) | 3464(2)  | 1         | 30(1)             |
| Cl(9)  | 9479(1)  | 6488(1) | 1576(2)  | 1         | 49(1)             |
| Cl(10) | 10608(1) | 6308(1) | 3753(2)  | 1         | 34(1)             |
| Cl(11) | 6927(1)  | 5618(1) | 2446(2)  | 1         | 35(1)             |
| Cl(12) | 7475(1)  | 6853(1) | 8447(2)  | 1         | 37(1)             |
| Cl(13) | 9348(1)  | 5321(1) | 684(2)   | 1         | 43(1)             |
| Cl(14) | 6286(1)  | 7500    | 10477(2) | 1         | 45(1)             |
| Cl(15) | 5968(1)  | 6930(1) | 7469(2)  | 1         | 56(1)             |
| Cl(16) | 9035(1)  | 6941(1) | 8594(2)  | 1         | 57(1)             |
| N(1)   | 8010(2)  | 6506(2) | 1570(3)  | 1         | 27(1)             |
| N(3)   | 9943(2)  | 4340(2) | 2166(3)  | 1         | 25(1)             |
| N(4)   | 8659(2)  | 4511(2) | 4230(3)  | 1         | 26(1)             |
| N(5)   | 7730(2)  | 6619(2) | 5214(3)  | 1         | 30(1)             |
| C(7)   | 8044(2)  | 6382(2) | 2983(4)  | 1         | 25(1)             |
| C(8)   | 9522(2)  | 4243(2) | 3178(4)  | 1         | 28(1)             |
| C(9)   | 8333(2)  | 4122(2) | 3930(5)  | 1         | 36(2)             |
| C(10)  | 8289(2)  | 4892(2) | 4331(5)  | 1         | 36(2)             |
| C(11)  | 10364(2) | 3998(2) | 2062(5)  | 1         | 36(2)             |
| C(13)  | 7888(2)  | 6756(2) | 3857(4)  | 1         | 28(1)             |
| C(15)  | 8163(3)  | 6358(2) | 5867(5)  | 1         | 57(2)             |
| C(16)  | 9100(2)  | 4597(2) | 3233(4)  | 1         | 28(1)             |
| C(17)  | 8148(2)  | 6145(2) | 674(5)   | 1         | 31(1)             |
| C(18)  | 7175(2)  | 6408(2) | 5236(6)  | 1         | 54(2)             |
| O(1)   | 6898(2)  | 6677(2) | 1727(4)  | 1         | 50(1)             |

|       |          |         |          |      |       |
|-------|----------|---------|----------|------|-------|
| N(2)  | 9990(3)  | 7500    | 4821(7)  | 1    | 75(2) |
| N(6)  | 9936(3)  | 7500    | 1115(7)  | 1    | 75(2) |
| C(3)  | 10152(4) | 7500    | 2430(9)  | 1    | 75(2) |
| C(1B) | 10821(5) | 6935(5) | 885(12)  | 0.50 | 75(2) |
| C(19) | 10263(5) | 7298(5) | 35(11)   | 0.50 | 75(2) |
| C(2)  | 9794(5)  | 7125(5) | 5560(12) | 0.50 | 75(2) |
| C(4)  | 9824(4)  | 7500    | 3452(9)  | 1    | 75(2) |

---

\* $U_{eq}$  is defined as one third of the trace of the orthogonalized  $U_{ij}$  tensor.

**Table S6.** Anisotropic displacement parameters ( $\text{\AA}^2 \times 10^3$ ) for **3** at 293(2) K with estimated standard deviations in parentheses.

| Label  | $U_{11}$ | $U_{22}$ | $U_{33}$ | $U_{12}$ | $U_{13}$ | $U_{23}$ |
|--------|----------|----------|----------|----------|----------|----------|
| Sb(1)  | 21(1)    | 23(1)    | 17(1)    | -2(1)    | 1(1)     | 1(1)     |
| Sb(2)  | 25(1)    | 22(1)    | 19(1)    | 0        | -2(1)    | 0        |
| Sb(3)  | 21(1)    | 23(1)    | 19(1)    | 0(1)     | -3(1)    | 1(1)     |
| Sb(4)  | 22(1)    | 26(1)    | 32(1)    | 0        | 1(1)     | 0        |
| Cl(1)  | 47(1)    | 28(1)    | 36(1)    | 6(1)     | 6(1)     | -5(1)    |
| Cl(2)  | 27(1)    | 52(1)    | 24(1)    | 6(1)     | -5(1)    | -5(1)    |
| Cl(3)  | 29(1)    | 48(1)    | 32(1)    | 0(1)     | 7(1)     | 2(1)     |
| Cl(4)  | 57(1)    | 30(1)    | 26(1)    | 0        | 5(1)     | 0        |
| Cl(5)  | 31(1)    | 25(1)    | 20(1)    | 0        | -3(1)    | 0        |
| Cl(6)  | 41(1)    | 40(1)    | 41(1)    | 0        | 0(1)     | 0        |
| Cl(7)  | 41(1)    | 38(1)    | 33(1)    | -6(1)    | 7(1)     | -6(1)    |
| Cl(8)  | 32(1)    | 32(1)    | 25(1)    | -5(1)    | -3(1)    | 0(1)     |
| Cl(9)  | 42(1)    | 38(1)    | 66(1)    | 0(1)     | -21(1)   | 19(1)    |
| Cl(10) | 31(1)    | 39(1)    | 33(1)    | -9(1)    | -6(1)    | -3(1)    |
| Cl(11) | 42(1)    | 35(1)    | 29(1)    | -14(1)   | 7(1)     | 0(1)     |
| Cl(12) | 41(1)    | 29(1)    | 39(1)    | -1(1)    | 1(1)     | 1(1)     |
| Cl(13) | 51(1)    | 38(1)    | 40(1)    | -8(1)    | -4(1)    | 6(1)     |
| Cl(14) | 33(1)    | 46(1)    | 56(2)    | 0        | 2(1)     | 0        |
| Cl(15) | 55(1)    | 51(1)    | 62(1)    | -27(1)   | -9(1)    | 4(1)     |
| Cl(16) | 67(1)    | 69(1)    | 36(1)    | 46(1)    | -7(1)    | -2(1)    |
| N(1)   | 32(2)    | 25(2)    | 23(2)    | -1(2)    | 1(2)     | -4(2)    |
| N(3)   | 25(2)    | 26(2)    | 23(2)    | -4(2)    | 3(2)     | 2(2)     |
| N(4)   | 21(2)    | 37(2)    | 18(2)    | 0(2)     | -1(2)    | 0(2)     |
| N(5)   | 45(2)    | 22(2)    | 22(2)    | -5(2)    | 7(2)     | -6(2)    |
| C(7)   | 26(2)    | 27(2)    | 22(2)    | 1(2)     | 0(2)     | 0(2)     |
| C(8)   | 26(2)    | 33(2)    | 24(2)    | -3(2)    | 4(2)     | 3(2)     |
| C(9)   | 30(2)    | 42(3)    | 34(3)    | -10(2)   | 1(2)     | -4(2)    |
| C(10)  | 29(2)    | 44(3)    | 34(3)    | 8(2)     | 4(2)     | -4(2)    |
| C(11)  | 33(2)    | 42(3)    | 33(3)    | 10(2)    | 3(2)     | -1(2)    |
| C(13)  | 38(2)    | 25(2)    | 23(2)    | -2(2)    | 1(2)     | -1(2)    |
| C(15)  | 92(4)    | 50(3)    | 28(3)    | 25(3)    | 1(3)     | 2(3)     |
| C(16)  | 26(2)    | 34(2)    | 24(2)    | 2(2)     | 4(2)     | 3(2)     |
| C(17)  | 32(2)    | 33(2)    | 28(2)    | 3(2)     | -1(2)    | -5(2)    |
| C(18)  | 63(3)    | 49(3)    | 49(3)    | -29(3)   | 26(3)    | -22(3)   |
| O(1)   | 35(2)    | 52(2)    | 63(3)    | 4(2)     | -10(2)   | 9(2)     |

|       |       |        |       |   |      |   |
|-------|-------|--------|-------|---|------|---|
| N(2)  | 54(2) | 132(4) | 40(2) | 0 | 3(2) | 0 |
| N(6)  | 54(2) | 132(4) | 40(2) | 0 | 3(2) | 0 |
| C(3)  | 54(2) | 132(4) | 40(2) | 0 | 3(2) | 0 |
| C(1B) | 54(2) | 132(4) | 40(2) | 0 | 3(2) | 0 |
| C(19) | 54(2) | 132(4) | 40(2) | 0 | 3(2) | 0 |
| C(2)  | 54(2) | 132(4) | 40(2) | 0 | 3(2) | 0 |
| C(4)  | 54(2) | 132(4) | 40(2) | 0 | 3(2) | 0 |

---

The anisotropic displacement factor exponent takes the form:  $-2\pi^2[h^2a^2U_{11} + \dots + 2hka^*b^*U_{12}]$ .

**Table S7.** Bond lengths [ $\text{\AA}$ ] for **3** at 293(2) K with estimated standard deviations in parentheses.

| Label          | Distances  | Label         | Distances |
|----------------|------------|---------------|-----------|
| Sb(1)-Cl(1)    | 2.4302(11) | N(3)-C(11)    | 1.488(5)  |
| Sb(1)-Cl(2)    | 2.4101(11) | N(4)-C(9)     | 1.489(6)  |
| Sb(1)-Cl(11)   | 2.4624(11) | N(4)-C(10)    | 1.502(5)  |
| Sb(2)-Cl(4)    | 2.8618(17) | N(4)-C(16)    | 1.496(5)  |
| Sb(2)-Cl(5)    | 2.5321(14) | N(5)-C(13)    | 1.492(5)  |
| Sb(2)-Cl(16)#1 | 2.4225(12) | N(5)-C(15)    | 1.488(6)  |
| Sb(2)-Cl(16)   | 2.4225(12) | N(5)-C(18)    | 1.503(6)  |
| Sb(3)-Cl(3)    | 2.4552(11) | C(7)-C(13)    | 1.521(6)  |
| Sb(3)-Cl(8)    | 2.8775(11) | C(8)-C(16)    | 1.515(6)  |
| Sb(3)-Cl(9)    | 2.4593(12) | N(2)-C(2)#1   | 1.475(15) |
| Sb(3)-Cl(10)   | 2.4883(11) | N(2)-C(2)     | 1.475(15) |
| Sb(3)-Cl(13)   | 2.8675(13) | N(2)-C(4)     | 1.444(11) |
| Sb(4)-Cl(6)    | 2.5773(19) | N(6)-C(3)     | 1.432(11) |
| Sb(4)-Cl(14)   | 2.735(2)   | N(6)-C(19)    | 1.493(13) |
| Sb(4)-Cl(15)#1 | 2.4512(13) | N(6)-C(19)#1  | 1.493(13) |
| Sb(4)-Cl(15)   | 2.4512(13) | C(3)-C(4)     | 1.307(13) |
| N(1)-C(7)      | 1.486(5)   | C(1B)-C(19)   | 1.970(19) |
| N(1)-C(17)     | 1.491(5)   | C(19)-C(19)#1 | 1.27(3)   |
| N(3)-C(8)      | 1.480(5)   |               |           |

Symmetry transformations used to generate equivalent atoms:

(1)  $x, -y+3/2, z$

**Table S8.** Bond angles [°] for **3** at 293(2) K with estimated standard deviations in parentheses.

| Label                 | Angles    | Label                 | Angles    |
|-----------------------|-----------|-----------------------|-----------|
| Cl(1)-Sb(1)-Cl(11)    | 90.55(4)  | Cl(15)-Sb(4)-Cl(15)#1 | 94.00(8)  |
| Cl(2)-Sb(1)-Cl(1)     | 92.47(4)  | C(7)-N(1)-C(17)       | 112.0(3)  |
| Cl(2)-Sb(1)-Cl(11)    | 91.10(4)  | C(8)-N(3)-C(11)       | 112.0(3)  |
| Cl(5)-Sb(2)-Cl(4)     | 172.27(5) | C(9)-N(4)-C(10)       | 110.6(3)  |
| Cl(16)#1-Sb(2)-Cl(4)  | 86.42(4)  | C(9)-N(4)-C(16)       | 113.1(3)  |
| Cl(16)-Sb(2)-Cl(4)    | 86.42(4)  | C(16)-N(4)-C(10)      | 109.2(3)  |
| Cl(16)#1-Sb(2)-Cl(5)  | 88.26(4)  | C(13)-N(5)-C(18)      | 112.0(4)  |
| Cl(16)-Sb(2)-Cl(5)    | 88.26(4)  | C(15)-N(5)-C(13)      | 112.8(4)  |
| Cl(16)-Sb(2)-Cl(16)#1 | 93.07(9)  | C(15)-N(5)-C(18)      | 112.6(4)  |
| Cl(3)-Sb(3)-Cl(8)     | 87.43(4)  | N(1)-C(7)-C(13)       | 110.1(3)  |
| Cl(3)-Sb(3)-Cl(9)     | 88.65(5)  | N(3)-C(8)-C(16)       | 109.9(3)  |
| Cl(3)-Sb(3)-Cl(10)    | 90.24(4)  | N(5)-C(13)-C(7)       | 112.0(3)  |
| Cl(3)-Sb(3)-Cl(13)    | 92.94(4)  | N(4)-C(16)-C(8)       | 112.0(3)  |
| Cl(9)-Sb(3)-Cl(8)     | 175.88(4) | C(2)-N(2)-C(2)#1      | 106.0(12) |
| Cl(9)-Sb(3)-Cl(10)    | 92.18(4)  | C(4)-N(2)-C(2)#1      | 113.4(6)  |
| Cl(9)-Sb(3)-Cl(13)    | 90.38(4)  | C(4)-N(2)-C(2)        | 113.4(6)  |
| Cl(10)-Sb(3)-Cl(8)    | 86.57(3)  | C(3)-N(6)-C(19)#1     | 119.2(7)  |
| Cl(10)-Sb(3)-Cl(13)   | 175.96(4) | C(3)-N(6)-C(19)       | 119.2(7)  |
| Cl(13)-Sb(3)-Cl(8)    | 91.09(3)  | C(19)-N(6)-C(19)#1    | 50.3(12)  |
| Cl(6)-Sb(4)-Cl(14)    | 177.06(5) | C(4)-C(3)-N(6)        | 120.9(9)  |
| Cl(15)#1-Sb(4)-Cl(6)  | 89.64(5)  | N(6)-C(19)-C(1B)      | 106.9(8)  |
| Cl(15)-Sb(4)-Cl(6)    | 89.64(5)  | C(19)#1-C(19)-N(6)    | 64.9(6)   |
| Cl(15)-Sb(4)-Cl(14)   | 88.35(5)  | C(19)#1-C(19)-C(1B)   | 125.4(6)  |
| Cl(15)#1-Sb(4)-Cl(14) | 88.35(5)  | C(3)-C(4)-N(2)        | 126.1(9)  |

Symmetry transformations used to generate equivalent atoms:

(1)  $x, -y+3/2, z$

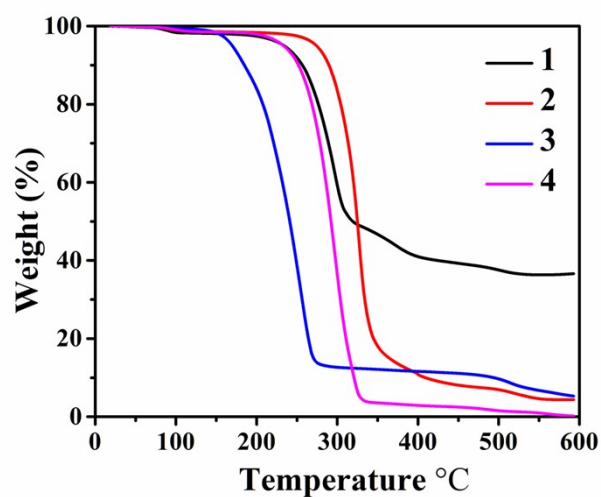

**Figure S1.** TGA curves of the obtained OIMHs 1-4.

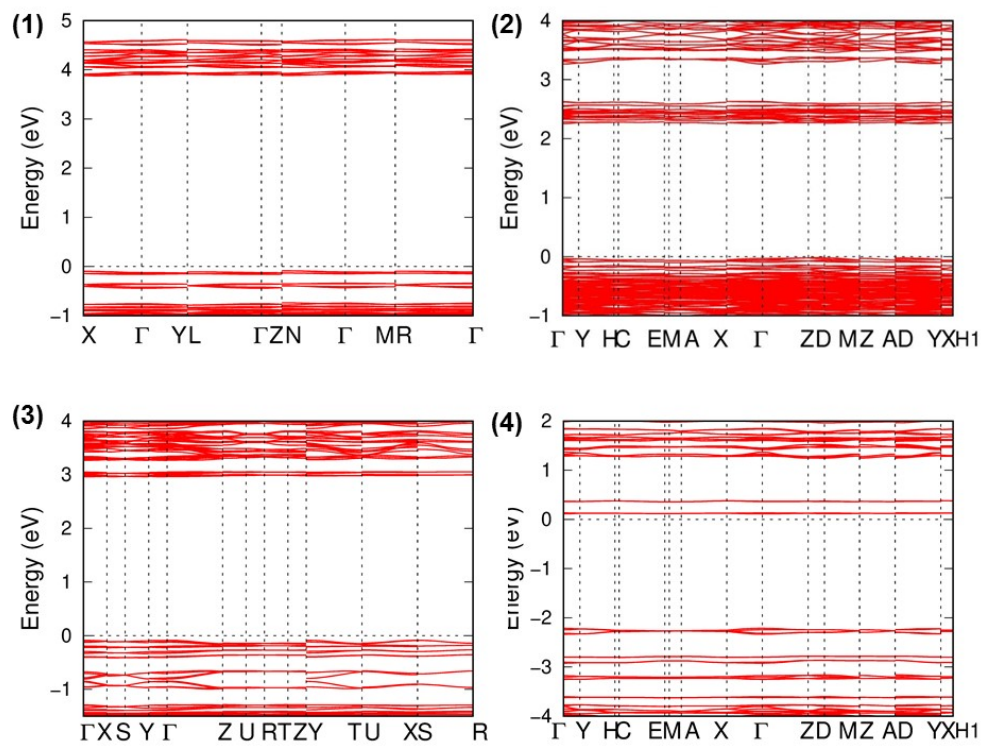

**Figure S2.** Band structures of compounds 1-4.

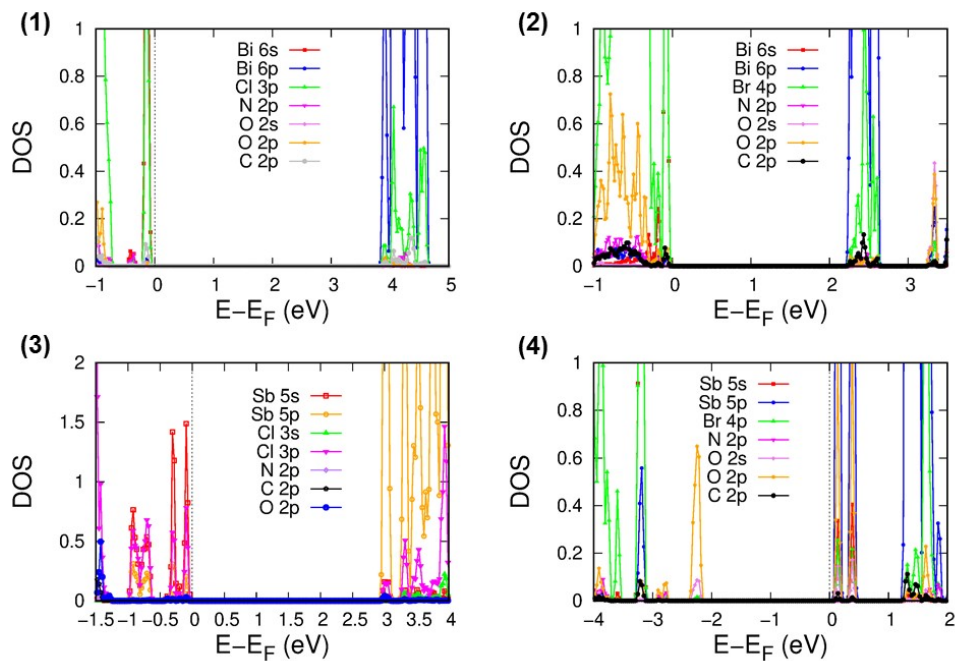

**Figure S3.** Densities of states and their orbital projections compounds 1-4.

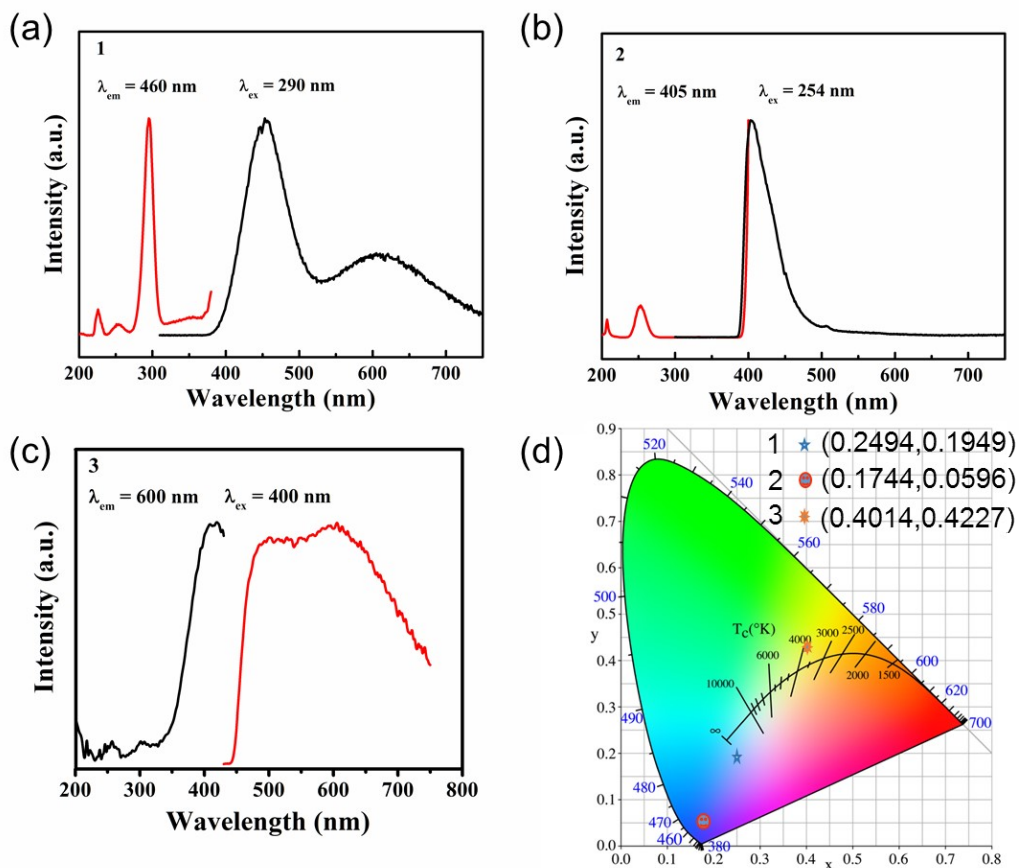

**Figure S4.** PLE and PL spectra of (a) 1, (b) 2 and (c) 3 at RT. (d) CIE color coordinates of 1-3.



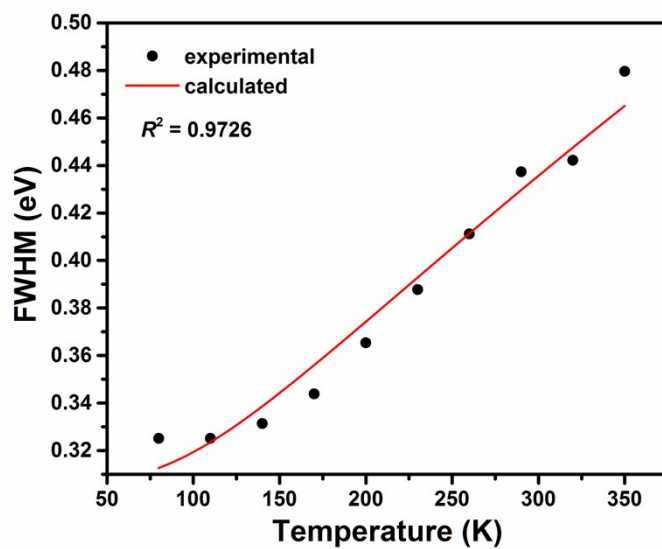

**Figure S5.** Fitting of the FWHM for compound **4** as a function of temperature.
